# Supplementary material
Source: Springer Nature journal article supplement (https://www.springermedizin.de/resource/supplementary/12889_2006_491_MOESM2_ESM.pdf/9500988)

**% EARLY STAGE**

120  
100  
80  
60  
40  
20  
0

1988 1999 1990 1991 1992 1993 1994 1995 1996 1997 1998 1999 2000 2001 2002 2003

**YEAR**

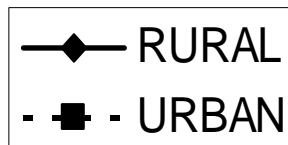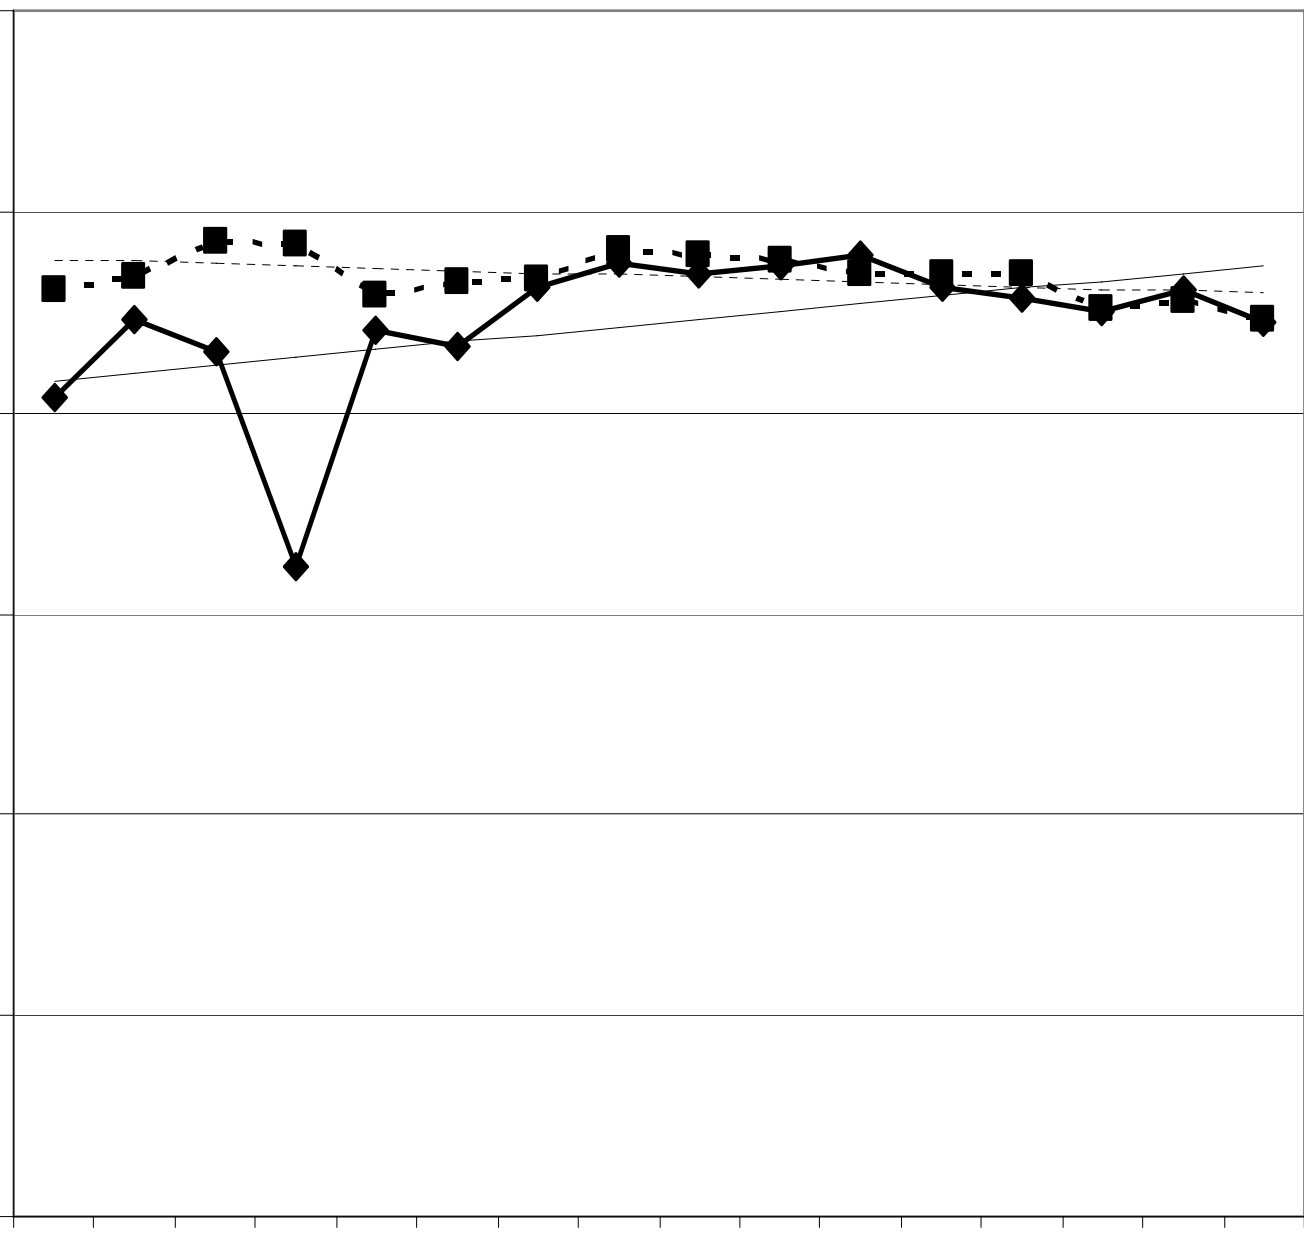

Supplement: MOESM2 [file 9500988]
